# Supplementary material
Source: MDPI journal article supplement (https://www.mdpi.com/2073-4352/12/2/278)
Supplement: s1 [file s1]

# Two Polynuclear Manganese(II) Complexes Based on multidentate N-heterocyclic aromatic ligand and V-shaped polycarboxylate ligand: Synthesis, Crystal Structure Analysis and Magnetic Properties

Huarui Wang \*, Jianhua Qin

Henan Key Laboratory of Function-Oriented Porous Materials, College of Chemistry and Chemical Engineering, Luoyang Normal University, Luoyang 471934, China;  
jh\_q128105@126.com

\* Correspondence: whr@lynu.edu.cn; Tel.: +86-379-6861-8321

**Table S1.** Selected bond lengths /Å and angles /° for **1-2**

| Complex 1           |            |                    |            |
|---------------------|------------|--------------------|------------|
| Mn(1)-O(8)          | 2.127(4)   | Mn(3)-O(7)         | 2.102(4)   |
| Mn(1)-O(2)#1        | 2.143(4)   | Mn(3)-O(1)         | 2.107(4)   |
| Mn(1)-O(13)         | 2.196(4)   | Mn(3)-N(14)#4      | 2.161(4)   |
| Mn(1)-N(15)         | 2.281(4)   | Mn(3)-N(19)        | 2.184(4)   |
| Mn(1)-N(18)         | 2.316(4)   | Mn(3)-N(13)#4      | 2.431(4)   |
| Mn(1)-N(17)         | 2.354(4)   | Mn(3)-N(21)        | 2.483(5)   |
| Mn(2)-O(11)#2       | 2.081(4)   | Mn(4)-O(12)        | 2.088(4)   |
| Mn(2)-O(6)#3        | 2.123(4)   | Mn(4)-O(5)#3       | 2.131(4)   |
| Mn(2)-O(14)         | 2.258(4)   | Mn(4)-N(8)#5       | 2.189(4)   |
| Mn(2)-N(4)          | 2.273(5)   | Mn(4)-N(3)         | 2.196(4)   |
| Mn(2)-N(7)          | 2.284(4)   | Mn(4)-N(10)#5      | 2.373(5)   |
| Mn(2)-N(6)          | 2.315(4)   | Mn(4)-N(2)         | 2.469(5)   |
| O(8)-Mn(1)-O(2)#1   | 89.29(16)  | O(7)-Mn(3)-O(1)    | 91.99(16)  |
| O(8)-Mn(1)-O(13)    | 166.96(16) | O(7)-Mn(3)-N(14)#4 | 103.58(16) |
| O(2)#1-Mn(1)-O(13)  | 84.96(15)  | O(1)-Mn(3)-N(14)#4 | 88.14(16)  |
| O(8)-Mn(1)-N(15)    | 93.66(16)  | O(7)-Mn(3)-N(19)   | 87.66(16)  |
| Complex 2           |            |                    |            |
| Mn(1)-O(7)#1        | 2.048(4)   | Mn(2)-O(9)         | 2.198(4)   |
| Mn(1)-O(6)#2        | 2.079(4)   | Mn(2)-N(7)         | 2.233(4)   |
| Mn(1)-O(4)          | 2.114(4)   | Mn(2)-N(4)         | 2.248(4)   |
| Mn(1)-N(8)          | 2.158(4)   | Mn(2)-N(6)         | 2.305(4)   |
| Mn(1)-N(10)         | 2.423(5)   | Mn(3)-O(1)#3       | 2.147(4)   |
| Mn(2)-O(3)          | 2.060(4)   | Mn(3)-N(3)         | 2.182(4)   |
| Mn(2)-O(8)          | 2.185(4)   | Mn(3)-O(1)         | 2.260(4)   |
| Mn(3)-Br(1)         | 2.4963(13) | Mn(3)-N(1)         | 2.356(5)   |
| O(7)#1-Mn(1)-O(6)#2 | 125.1(2)   | Mn(3)-O(2)         | 2.435(4)   |
| O(7)#1-Mn(1)-O(4)   | 96.30(19)  | N(3)-Mn(3)-O(1)    | 108.64(16) |
| O(6)#2-Mn(1)-O(4)   | 93.90(19)  | N(3)-Mn(3)-N(1)    | 72.23(16)  |
| O(7)#1-Mn(1)-N(8)   | 109.42(18) | O(1)-Mn(3)-N(1)    | 164.41(16) |
| O(6)#2-Mn(1)-N(8)   | 121.27(18) | O(1)-Mn(3)-O(2)    | 54.79(14)  |
| O(4)-Mn(1)-N(8)     | 100.70(16) | O(1)#3-Mn(3)-Br(1) | 110.80(12) |
| O(4)-Mn(1)-N(10)    | 170.38(16) | N(3)-Mn(3)-Br(1)   | 142.45(12) |
| N(8)-Mn(1)-N(10)    | 70.66(15)  | O(1)-Mn(3)-Br(1)   | 98.55(11)  |
| O(3)-Mn(2)-O(8)     | 84.04(16)  | Mn(3)#3-O(1)-Mn(3) | 104.88(15) |
| O(3)-Mn(2)-O(9)     | 93.25(16)  | N(7)-N(8)-Mn(1)    | 132.9(3)   |
| O(8)-Mn(2)-O(9)     | 176.43(15) | N(8)-N(7)-Mn(2)    | 134.4(3)   |

Symmetry transformations used to generate equivalent atoms in **(1)**: #1 -x+1, y-1/2, -z+3/2; #2 -x+2, y+1/2, -z+3/2; #3 x+1, y, z; #4 -x+1, y+1/2, -z+3/2; #5 -x+2, y-1/2, -z+3/2.; **(2)**: #1 x, y+1, z  
#2 -x+2, -y, -z+1      #3 -x+1, -y, -z.

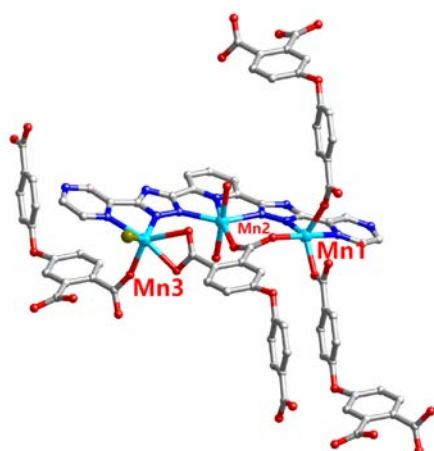

**Figure S1.** The 4-connected network and tri-nucleated Mn(II) cluster of complex **2**.

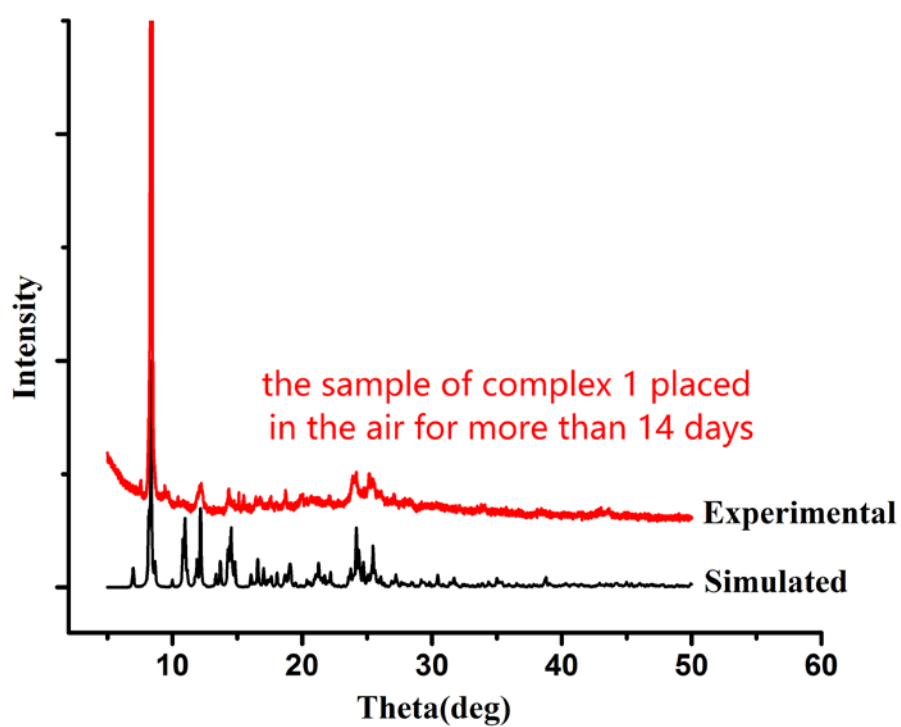

**Figure S2.** Simulated and experimental PXRD pattern of **1** placed in the air for more than 14 days.
